# Supplementary material
Source: MDPI journal article supplement (https://www.mdpi.com/2297-8739/10/3/176)
Supplement: s1 [file s1]

Table S1. Standard recipe for production of Frankfurter sausages.

| proportion (%) | Ingredient <sup>1</sup>              |
|----------------|--------------------------------------|
| 30             | beef 80/20 (lean/fat)                |
| 30             | pork 90/10 (lean/fat)                |
| 18             | pork back fat                        |
| 1.8            | nitrite curing salt                  |
| 0.2            | sodium diphosphate                   |
| 0.05           | ascrobic acid                        |
| 0.5            | spice mixture „extra class sausages“ |
| 0.2            | dextrose                             |
| 1              | fresh onions                         |
| 0.1            | garlic paste                         |

<sup>1</sup> The meat, casings and additives were purchased from MEGA eG (Stuttgart, Germany) the spices from Frutarom Production GmbH (Freilassing, Germany).

Table S2. System control for the process steps smoking and cooking of frankfurter-type sausages. CA = Circulating air, TA = Transporting air, SA = Smoking air  
<sup>1</sup>Heating electrode: 132 s; Ignition suppression: 1s; wood chips transport: every 45 seconds for 3 seconds.  $t_K$  represents the variable smoking time

|    | process              | t     | T            |         | Humidity | Fresh | Exhaust | CA  | throttle | TA  | SA  | smoke   |
|----|----------------------|-------|--------------|---------|----------|-------|---------|-----|----------|-----|-----|---------|
|    | step                 | [min] | [°C]         |         | [%]      | air   | [%]     | [%] | [%]      | [%] | [%] | fan [%] |
|    |                      |       | chamber      | surface |          | [%]   |         |     |          |     |     |         |
| 1  | shower               | 15 s  | -            | -       | -        | -     | -       | -   | -        | -   | -   | -       |
| 2  | reddening            | 30    | 55           | 48      | 80       | -     | -       | 70  | -        | -   | -   | -       |
| 3  | drying               | 12    | 50           | -       | -        | 100   | 100     | 70  | -        | 100 | 100 | -       |
| 4  | smoking <sup>1</sup> | $t_K$ | 45-<br>55°C- | -       | -        | -     | 75      | 50  | 100      | 100 | 100 | 100     |
| 5  | smoke                |       | 45-          | -       | -        | 50    | 50      | 30  | 100      |     |     |         |
|    | circulation          | 5     | 55°C-        |         |          |       |         |     |          |     |     |         |
| 6  | cooking              | 20    | 75           | -       | 97       | -     | -       | 80  | -        | -   | -   | -       |
| 7  | evacuate             | 1     | -            | -       | -        | 100   | 100     | 80  |          |     |     |         |
| 8  | shower               | 10    | -            | -       | -        | -     | 50      | 30  | -        | -   | -   | -       |
| 9  | break + signal       | -     | -            | -       | -        | -     | -       | -   | -        | -   | -   | -       |
| 10 | evacuate             | 2     | -            | -       | -        | -     | 75      | 50  | 100      | 100 | 100 | 100     |

Table S3. Settings and resulting air volume flow for smoldering air and mean pyrolysis temperature applied in investigations (TA = transportation air, SA = smoldering air, SF = smoker fan). \*Hole diameters of TA and SA holes in hole plates: Plate S: SA: 5.60 mm, TA: 24.95 mm; Plate L: SA: 8.51 mm, TA: 37.90 mm.

| Settings        | Hole Plate | TA [%]                                           | SA [%]                                                           | SF [%]                          | resulting pyrolysis temperature [°C] |
|-----------------|------------|--------------------------------------------------|------------------------------------------------------------------|---------------------------------|--------------------------------------|
| Operation range | *          | regulated by dampers in both feed pipes, 0-100 % | 0-50 Hz, specified here as a proportion of the maximum frequency |                                 |                                      |
|                 | L          | 100                                              | 100                                                              | 100                             | 900                                  |
|                 | L          | 100                                              | 70                                                               | 100 (at 750 °C switch to 35 Hz) | 750                                  |
|                 | S          | 100                                              | 100                                                              | 100 (at 600 °C switch to 35 Hz) | 600                                  |
|                 | S          | 100                                              | 100                                                              | 100 (at 450 °C switch to 20 Hz) | 450                                  |
|                 | S          | 100                                              | 100                                                              | 70 (at 250 °C switch to 7.5 Hz) | 300                                  |
|                 | S          | 100                                              | 100                                                              | 50 (at 150 °C switch to 5 Hz)   | 150                                  |

Table S4. Relative peak areas [%] of the substance classes carbonyls, furans, lactones in food smoke depending on pyrolysis temperature.

| Pyrolysis temperature [°C] | Relative Peak Area [%]    |                            |             |                           |
|----------------------------|---------------------------|----------------------------|-------------|---------------------------|
|                            | carbonyls                 | furans                     | lactones    | phenols                   |
| 150                        | 14.70 ± 1.31 <sup>a</sup> | 14.68 ± 3.21 <sup>a</sup>  | 4.29 ± 1.37 | 66.33 ± 1.09 <sup>a</sup> |
| 300                        | 14.05 ± 0.78 <sup>a</sup> | 11.83 ± 2.99 <sup>ab</sup> | 3.96 ± 0.63 | 70.16 ± 1.59 <sup>a</sup> |
| 450                        | 9.76 ± 0.54 <sup>b</sup>  | 5.97 ± 1.15 <sup>c</sup>   | 3.68 ± 0.28 | 80.58 ± 1.94 <sup>b</sup> |
| 600                        | 10.61 ± 1.24 <sup>b</sup> | 5.18 ± 0.80 <sup>c</sup>   | 4.43 ± 0.39 | 79.77 ± 2.19 <sup>b</sup> |
| 750                        | 10.5 ± 0.48 <sup>b</sup>  | 6.40 ± 1.19 <sup>bc</sup>  | 4.35 ± 0.25 | 78.75 ± 1.81 <sup>b</sup> |
| 900                        | 9.37 ± 0.41 <sup>b</sup>  | 6.39 ± 1.05 <sup>bc</sup>  | 4.25 ± 0.18 | 80.00 ± 1.62 <sup>b</sup> |

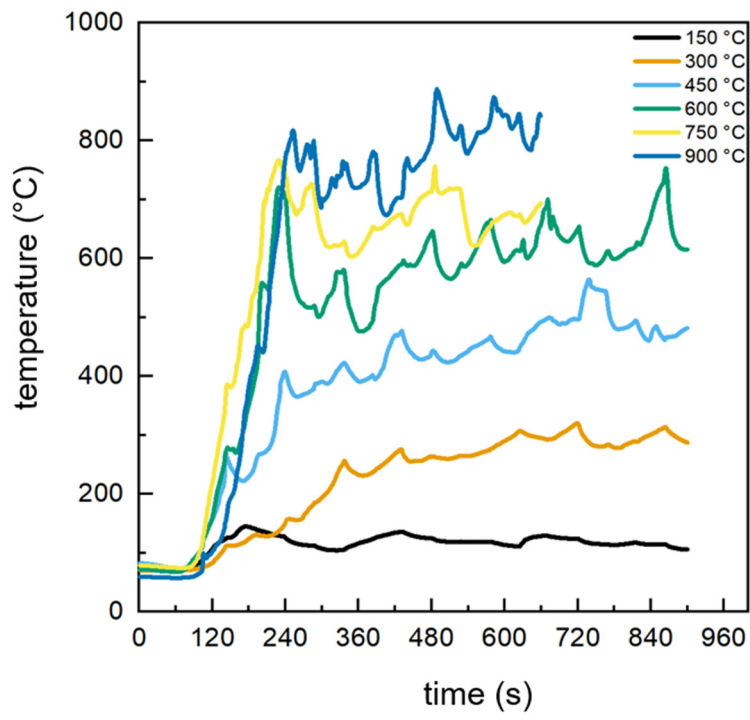

Figure S1: Temperature curves of smoldering zone temperature sensor while different approaches.
